# Supplementary material
Source: publisher figshare collection journal article supplement (https://acs.figshare.com/ndownloader/files/12757460)
Supplement: Supplementary file 1 [file 12757460]

## Supporting Information I

**Native proteomics in discovery mode using size exclusion chromatography-capillary zone electrophoresis-tandem mass spectrometry**

Xiaojing Shen, Qiang Kou, Ruiqiong Guo, Zhichang Yang, Daoyang Chen, Xiaowen Liu, Heedeok Hong and Liangliang Sun \*

\* Corresponding author. E-mail: [lsun@chemistry.msu.edu](mailto:lsun@chemistry.msu.edu)

## Table of Contents

|                                                        | Page |
|--------------------------------------------------------|------|
| <b>Experimental Procedures</b>                         | 3-7  |
| Materials and chemicals                                | 3    |
| Preparation of LPA-coated separation capillary for CZE | 3    |
| Sample preparation                                     | 3-4  |
| SDS-PAGE                                               | 4    |
| Native CZE-ESI-MS and MS/MS analysis                   | 5    |
| Data analysis                                          | 5-6  |
| Workflow for identification of protein complexes       | 6-7  |
| <b>Table S1</b>                                        | 8    |
| <b>Table S2</b>                                        | 9    |
| <b>Table S3</b>                                        | 10   |
| <b>Table S4</b>                                        | 11   |
| <b>Table S5</b>                                        | 12   |
| <b>Figure S1</b>                                       | 13   |
| <b>Figure S2</b>                                       | 14   |
| <b>Figure S3</b>                                       | 15   |
| <b>Figure S4</b>                                       | 16   |
| <b>Figure S5</b>                                       | 17   |
| <b>Figure S6</b>                                       | 18   |
| <b>Figure S7</b>                                       | 19   |
| <b>Figure S8</b>                                       | 20   |
| <b>References</b>                                      | 21   |

## **Experimental Procedures**

### **Materials and chemicals**

3-(Trimethoxysilyl)propyl methacrylate, ammonium persulfate, ammonium acetate (NH<sub>4</sub>AC) and the Microcon-30kDa centrifugal filter units for buffer exchange were purchased from Sigma-Aldrich (St. Louis, MO). Hydrofluoric acid (HF) and LC/MS grade water were purchased from Fisher Scientific (Pittsburgh, PA). Acrylamide were purchased from Acros Organics (NJ, USA). Bare fused silica capillaries (50- $\mu$ m i.d., 360- $\mu$ m o.d.) were purchased from Polymicro Technologies (Phoenix, AZ).

### **Preparation of LPA-coated separation capillary for CZE**

The inner wall of the separation capillary (50- $\mu$ m i.d., 360- $\mu$ m o.d.) was coated with LPA based on the protocol described in references [1] and [2]. A bare fused silica capillary was successively flushed with 1 M hydrochloric acid, water, 1 M sodium hydroxide, water, and methanol, followed by treatment with 3-(trimethoxysilyl) propyl methacrylate to introduce carbon-carbon double bonds on the inner wall of the capillary. The treated capillary was filled with degassed acrylamide solution in water containing ammonium persulfate, followed by incubation at 50 °C water bath for 35 to 40 min with both ends sealed by silica rubber. After that, the capillary was flushed with water to remove the unreacted reagents. Then one end of the LPA-coated capillary was etched with HF based on the protocol in reference [3] to reduce its outer diameter to around 70  $\mu$ m.

### **Sample preparation**

*E. coli* (strain MG1655) was cultured in Lysogeny broth medium at 37 °C until OD<sub>600</sub> reached 0.7. After washed with PBS three times, the cells were lysed in a PBS buffer plus 10 mM magnesium chloride, 2 mM calcium chloride and complete protease inhibitors (Roche) and homogenized for 30 s, followed by sonication with a Branson Sonifier 250 (VWR Scientific, Batavia, IL) on ice for 2 minutes. After centrifugation, the supernatant containing the extracted proteins was collected. A small aliquot of the diluted sample was used for the bicinchoninic acid (BCA) assay to determine the protein concentration.

One aliquot of the *E. coli* lysate containing about 600 µg of proteins (~2 mg/mL) was fractionated with size exclusion chromatography (SEC) on an Agilent Infinity II HPLC system. The SEC column (4.6 x 300 mm, 2.7 µm particles, 300 Å pores) was from Agilent. The mobile phase was 100 mM NH<sub>4</sub>Ac (pH 7.0), and the flow rate was 0.15 mL/min. 8 fractions were collected from 11-19 min (1 min for each fraction) for relatively small proteins based on our preliminary experiment. Then each fraction was loaded onto a Microcon-30 kDa centrifugal filter unit, respectively, followed by centrifugation to remove the lysis buffer. We washed the membrane with 50 mM NH<sub>4</sub>Ac (pH 6.9) for buffer exchange, followed by adding 40 µL of 50 mM NH<sub>4</sub>Ac (pH 6.9) into each filter unit to extract the proteins on the membrane. We gently vortexed the filter units for 5 min and took the protein solution from the filter units for native CZE-MS/MS analysis. The use of Microcon-30 kDa centrifugal filter unit for buffer exchange was based on the recent native proteomics work from the Kelleher group.<sup>[4]</sup>

## **SDS-PAGE**

In order to evaluate the sample loss during the buffer exchange with Microcon-30 kDa centrifugal filter units, we analyzed the *E. coli* whole cell lysate before and after the buffer exchange as well as the flow through using SDS-PAGE. About 400 µg of *E. coli* proteins in 50 µL of the lysis buffer were loaded onto one membrane filter, followed by centrifugation at 10 000 g for 10 min. The membrane was washed with 100 µL of 50 mM NH<sub>4</sub>Ac (pH 6.9). After centrifugation, 100 µL of 50 mM NH<sub>4</sub>Ac (pH 6.9) was added onto the membrane to extract the proteins. The membrane filter was gently vortexed for 5 min. After that, the protein solution on the membrane was collected and lyophilized to about 50 µL for the SDS-PAGE experiment. The flow-through during the buffer exchange (~150 µL) was collected and lyophilized to about 50 µL for the SDS-PAGE experiment. We performed the buffer exchange experiment twice as technical duplicate. The samples from the technical duplicate were loaded onto an SDS-PAGE gel for analysis. Two microliters of the *E. coli* sample before and after the buffer exchange (~16 µg of proteins in theory) and 2 µL of the flow-through sample were analyzed by SDS-PAGE. The Coomassie blue solution was used for staining.

## **Native CZE-ESI-MS and MS/MS analysis**

An ECE-001 capillary electrophoresis autosampler (CMP Scientific, Brooklyn, NY) was used for automated operation of CZE. A commercialized electrokinetically pumped sheath flow interface (CMP Scientific) was used to couple CZE to MS.<sup>[5,6]</sup> A Q-Exactive HF mass spectrometer (Thermo Fisher Scientific) were used for the experiments. The commercialized electrokinetically pumped sheath flow interface (CMP Scientific) was directly attached to the Q-Exactive HF mass spectrometer for experiments. The ESI emitters of the CZE-MS interface were pulled from borosilicate glass capillaries (1.0 mm o.d., 0.75 mm i.d., 10 cm length) with a Sutter P-1000 flaming/brown micropipet puller. The opening size of the ESI emitters was 20  $\mu\text{m}$ . The spray emitter with  $\sim 4$  cm length was typically used. Voltage for ESI was  $\sim 2$  kV.

A 1-meter LPA coated capillary (50- $\mu\text{m}$  i.d. and 360- $\mu\text{m}$  o.d.) was used for the CZE. The background electrolyte (BGE) for CZE was 50 mM  $\text{NH}_4\text{Ac}$  (pH 6.9), and the sheath buffer was 25 mM  $\text{NH}_4\text{AC}$  (pH 6.9). 15 kV was applied at the sample injection end and 1 psi was applied at the mean time for CZE separation. The *E. coli* sample was injected into the separation capillary for CZE-MS/MS with 5-psi pressure for 20 s.

A Q-Exactive HF mass spectrometer (Thermo Fisher Scientific) was used for all of the experiments. The transfer capillary temperature was 200  $^{\circ}\text{C}$ , and the S-lens RF level was 50. A top3 data dependent acquisition (DDA) method was used. The number of microscans was 3 for both MS and MS/MS. The resolution for MS and MS/MS was 240,000 and 120,000 ( $m/z$  200), respectively. The AGC target was 3E6 for MS and 1E6 for MS/MS. The maximum injection time was 200 ms for MS and 500 ms for MS/MS. The mass range for MS scans was 1000-4000  $m/z$ . Three most abundant protein peaks in the mass spectrum were sequentially isolated with isolation window as 4  $m/z$  in the quadrupole, followed by fragmentation with normalized collisional energy (NCE) as 35. "Exclude isotopes" was turned on and the dynamic exclusion was 30 s.

## Data analysis

The RAW files were first converted into mzML files using Msconvert tool.<sup>[7]</sup> Then, TopFD (TOP-Down Mass Spectrometry Feature Detection) was used for the spectral deconvolution to produce msalign files. TopFD (<http://proteomics.informatics.iupui.edu/software/toppic/>) is an improved version of MS-

Deconv.<sup>[8]</sup> Finally, TopPIC (version 1.1.3)<sup>[9]</sup> was used for database search with msalign files as input. The *E. coli* UniProt database (UP000000625, 4307 entries) was used for database search. The false discovery rates (FDRs) were estimated using the target-decoy approach.<sup>[10]</sup> The database search parameters were as follows: the maximum number of unexpected modifications as 2, the precursor and fragment mass error tolerances as 15 ppm, and the mass shift of unknown modifications as -200 to 10000 Da. In order to reduce the redundancy of proteoform identifications (IDs), proteoforms identified by multiple spectra were considered as one proteoform ID if those spectra match the same proteoform feature reported by TopFD or those proteoforms belong to the same protein and have similar precursor masses (within 1.2 Da).

Two rounds of analyses were performed. TopPIC was employed to search each raw file against the *E. coli* database separately, and no filter was applied in this step. Then, all the proteoform spectrum-matches (PrSMs) identified from the 8 SEC fractions were combined and filtered out with a 1% spectrum-level FDR. The identified proteoforms were further filtered with a 5% proteoform-level FDR. The identified proteoforms are listed in **Supporting Information II**.

### **Workflow for identification of protein complexes**

First, we performed a regular data dependent acquisition (DDA) experiment on the fractionated *E. coli* samples to acquire MS and MS/MS spectra of the proteins and protein complexes. We isolated a protein or a whole protein complex with the quadrupole, followed by HCD fragmentation of the protein or protein complex.

Second, we performed a database search of the acquired MS and MS/MS spectra using TopPIC to identify proteoforms.

Third, we believe if one proteoform is a complex with some co-factor, after database search there should be a detected mass shift that matches with the mass of the co-factor. We obtained a potential protein cofactor list from the UniProt *E.coli* database, as shown in **Table S2**. Here we take RNA polymerase-binding transcription factor DksA as

an example. We identified this protein by TopPIC and obtained the proteoform as shown in **Figure S3**. We found it has an unknown modification of ~63.5 Da, which is close to the mass of zinc or copper. We think the proteoform should be a potential protein complex with a zinc ion or a copper ion.

Fourth, in order to confirm this modification (+63.5) is not an unusual covalent modification, we compared the proteoform with our recently published large-scale top-down proteomics dataset of *E. coli* under a denaturing condition.<sup>[11]</sup> If the proteoform matches with some proteoform identified under the denaturing condition in terms of the mass shift within a 4-Da mass tolerance, we think the modification (+63.5) should be some covalent modification and the proteoform is not a protein-metal complex. If we did not observe any proteoform similar to the proteoform identified in this work, we conclude the proteoform should be a protein complex.

Finally, we went back to UniProt and tried to seek some information in the literature on the protein complex. In this case, we found the RNA polymerase-binding transcription factor DksA had been reported to bind with a zinc ion and has no other modifications of the same mass. Then we confirmed the identification of the protein complex with a zinc ion. If we did not get literature information of some protein complexes, we reported those protein complexes as unreported protein complexes.

For the identification of homodimers, we used the similar workflow. Because the mass shift in this case is very big, it should not correspond to a co-factor. If the mass shift of some proteoform is 50% of the detected proteoform mass, we think the proteoform should represent a homodimer. We considered hetero-oligomers in the experiment via manually evaluating the proteoforms with large mass shifts but we only found small homodimers.

**Table S1.** The list of the identified protein complexes with the SEC-CZE-MS/MS from the *E. coli* proteome.

| Protein complex         | UniProt accession # | Protein name                                     | Mass difference (observed-theoretical, Da) | First amino acid | Last amino acid | E-value  | Unreported |
|-------------------------|---------------------|--------------------------------------------------|--------------------------------------------|------------------|-----------------|----------|------------|
| Homodimer               | P0AES9              | Acid stress chaperone HdeA                       | 18                                         | 22               | 110             | 4.51E-13 | X          |
|                         | P0AES9              | Acid stress chaperone HdeA                       | -3.5                                       | 22               | 110             | 1.06E-11 |            |
|                         | P0AES9              | Acid stress chaperone HdeA                       | 58                                         | 22               | 110             | 1.29E-06 | X          |
|                         | P0AA04              | Phosphocarrier protein HPr                       | -0.31                                      | 1                | 85              | 1.35E-25 | X          |
| Zinc ion binding        | P0AAZ7              | UPF0434 protein YcaR                             | -2.2                                       | 1                | 60              | 1.74E-07 |            |
|                         | P0ABS1              | RNA polymerase-binding transcription factor DksA | -1.9                                       | 1                | 151             | 1.03E-19 |            |
|                         | P0AEG4              | Thiol:disulfide interchange protein DsbA         | -3.7                                       | 20               | 208             | 1.66E-18 |            |
|                         | P0AEG4              | Thiol:disulfide interchange protein DsbA         | 0.74                                       | 146              | 208             | 1.33E-09 | X          |
| Copper ion binding      | P0AA25              | Thioredoxin 1                                    | -0.23                                      | 2                | 109             | 6.17E-10 |            |
|                         | P64534              | Nickel/cobalt homeostasis protein RcnB           | 1.5                                        | 27               | 112             | 2.06E-12 |            |
|                         | P0AA57              | Protein YobA                                     | -1.6                                       | 27               | 124             | 1.40E-11 |            |
| Zinc/copper ion binding | P09372              | Protein GrpE                                     | -2.7/-0.89                                 | 2                | 197             | 7.85E-25 | X          |
|                         | P0A800              | DNA-directed RNA polymerase subunit omega        | -0.43/1.4                                  | 26               | 91              | 6.54E-08 | X          |
|                         | P0A9X9              | Cold shock protein CspA                          | -0.40/1.4                                  | 2                | 70              | 1.70E-10 | X          |
|                         | P0AA04              | Phosphocarrier protein HPr                       | 0.57/2.4                                   | 1                | 85              | 1.67E-07 | X          |
|                         | P0AC59              | Glutaredoxin 2                                   | -0.62/1.2                                  | 1                | 215             | 9.29E-08 | X          |
|                         | P0ADU5              | Protein YgiW                                     | -3.1/-1.2                                  | 21               | 130             | 7.51E-16 | X          |
|                         | P0AEQ3              | Glutamine-binding periplasmic protein            | -1.6/0.26                                  | 23               | 248             | 2.35E-09 | X          |
|                         | P0AF36              | Cell division protein ZapB                       | 0.58/2.4                                   | 4                | 81              | 1.47E-21 | X          |
| [2Fe-2S] binding        | P76402              | UPF0339 protein YegP                             | -1.9/-0.060                                | 2                | 110             | 1.23E-14 | X          |
|                         | P0A9R4              | 2Fe-2S ferredoxin                                | -2.6                                       | 2                | 111             | 4.55E-10 |            |
|                         | P0A9R4              | 2Fe-2S ferredoxin                                | 21                                         | 2                | 111             | 3.49E-08 | X          |
| Glutamine binding       | P0AEQ3              | Glutamine-binding periplasmic protein            | -0.23                                      | 23               | 248             | 1.61E-14 |            |



**Table S2.** The names and masses of the major protein co-factors in the UniProt *E. coli* database.

| <b>Cofactor</b>                            | <b>MW (Da)</b> |
|--------------------------------------------|----------------|
| Mg(2+)                                     | 24             |
| chloride                                   | 35.5           |
| K(+)                                       | 39             |
| Ca(2+)                                     | 40             |
| Mn(2+)                                     | 55             |
| Fe(2+)                                     | 56             |
| Ni(2+)                                     | 58.7           |
| Co(2+)                                     | 59             |
| hydrogencarbonate                          | 61             |
| Cu(2+)                                     | 64             |
| Zn(2+)                                     | 65             |
| pyruvate                                   | 87.05          |
| [2Fe-2S] cluster                           | 175.8          |
| (R)-lipoate                                | 206            |
| pyridoxal 5'-phosphate                     | 245.126        |
| [3Fe-4S] cluster                           | 296            |
| pyrroloquinoline quinone                   | 327.182        |
| [4Fe-4S] cluster                           | 352            |
| pantetheine 4'-phosphate                   | 356.333        |
| dipyrromethane                             | 416            |
| thiamine diphosphate                       | 422.29         |
| FMN                                        | 453.321        |
| FMNH <sub>2</sub>                          | 456.344        |
| Mo-molybdopterin                           | 519.26         |
| heme b                                     | 614.471        |
| NAD(+)                                     | 663.43         |
| NADP(+)                                    | 744.41         |
| FAD                                        | 782.5          |
| siroheme                                   | 908.597        |
| methylcob(III)alamin                       | 1344.38        |
| adenosylcob(III)alamin                     | 1579.58        |
| Mo-bis(molybdopterin guanine dinucleotide) | 1584.99        |

**Table S3.** The metal binding stoichiometry of some identified metalloproteins.

| Cofactor        | Protein name                                     | Relative abundance (metal binding/no binding)* | Number of C/H/D/E in the protein sequence** |
|-----------------|--------------------------------------------------|------------------------------------------------|---------------------------------------------|
| Zinc ion        | UPF0434 protein YcaR                             | >8.0                                           | 3/1/4/6                                     |
|                 | RNA polymerase-binding transcription factor DksA | >10                                            | 4/2/10/22                                   |
|                 | Thiol:disulfide interchange protein DsbA         | 0.50                                           | 2 (S-S)/3/12/12***                          |
| Copper ion      | Thioredoxin 1                                    | 0.60                                           | 2(S-S)/1/11/5***                            |
|                 | Nickel/cobalt homeostasis protein RcnB           | 0.70                                           | 0/3/7/4                                     |
|                 | Protein YobA                                     | 0.20                                           | 0/6/4/4                                     |
| Zinc/copper ion | Protein GrpE                                     | 0.60                                           | 0/3/13/26                                   |
|                 | DNA-directed RNA polymerase subunit omega        | 0.20                                           | 0/0/5/12                                    |
|                 | Cold shock protein CspA                          | 0.80                                           | 0/1/6/2                                     |
|                 | Phosphocarrier protein HPr                       | 0.50                                           | 0/2/1/9                                     |
|                 | Glutaredoxin 2                                   | 0.20                                           | 2 (S-S)/4/19/9***                           |
|                 | Protein YgiW                                     | 0.20                                           | 1/1/11/6                                    |
|                 | Glutamine-binding periplasmic protein            | 0.30                                           | 0/2/22/10                                   |
|                 | Cell division protein ZapB                       | 0.30                                           | 0/2/1/16                                    |
|                 | UPF0339 protein YegP                             | 0.10                                           | 0/1/2/8                                     |

\* The relative abundance was calculated based on the intensity of the proteoforms with and without metal binding. The averaged mass spectra across the proteoform peaks were used for the calculation. \*\* C for cysteine, H for histidine, D for aspartic acid, and E for glutamic acid. \*\*\* The two cysteine amino acids form a disulfide bond based on the database search results and/or the UniProt *E. coli* database.

**Table S4.** The list of some of the post-translational modifications (PTMs) detected in this work.

| PTMs                         | Protein name                                              | Mass error (Da) | E-value  | Unreported* |
|------------------------------|-----------------------------------------------------------|-----------------|----------|-------------|
| C-terminal thiocarboxylation | Molybdopterin synthase sulfur carrier subunit             | -0.09           | 2.90E-08 |             |
| Phosphorylation on histidine | PTS system glucose-specific EIIA component                | -0.7            | 1.79E-29 |             |
| Biotinylation                | Biotin carboxyl carrier protein of acetyl-CoA carboxylase | -0.2            | 2.28E-17 |             |
| 4'-Phosphopantetheine        | Acyl carrier protein                                      | -0.92           | 6.42E-41 |             |
| Disulfide bond               | Peroxiredoxin Bcp                                         | -0.94           | 4.35E-22 |             |
|                              | Thiol:disulfide interchange protein DsbA                  | -2.4            | 1.84E-18 |             |
|                              | Thioredoxin 1                                             | -0.01           | 2.90E-34 |             |
|                              | Glutaredoxin 3                                            | 0.00            | 2.40E-27 |             |
|                              | Fe/S biogenesis protein NfuA                              | 0.00            | 3.88E-26 |             |
|                              | Putative sulfur carrier protein YeeD                      | -0.02           | 9.86E-14 |             |
|                              | Uncharacterized protein YbgS                              | -0.02           | 1.91E-11 |             |
|                              | 50S ribosomal protein L31                                 | -0.03           | 1.22E-18 |             |

\* The disulfide bonds in the proteins highlighted in green have not been reported in the literature.

**Table S5.** The list of proteins with unreported signal peptide cleavage and initial methionine excision.

| <b>Unreported signal peptide cleavage</b>                            |                  |                 |
|----------------------------------------------------------------------|------------------|-----------------|
| Protein name                                                         | First amino acid | Last amino acid |
| Maltose operon periplasmic protein                                   | 27               | 306             |
| 30S ribosome-binding factor                                          | 30               | 133             |
| DNA-directed RNA polymerase subunit omega                            | 26               | 91              |
| Phosphocarrier protein HPr                                           | 11               | 85              |
| Protein YcgL                                                         | 12               | 108             |
| Biotin carboxyl carrier protein of acetyl-CoA carboxylase            | 8                | 156             |
| Uncharacterized protein YhhA                                         | 19               | 146             |
| Cell division protein ZapB                                           | 4                | 81              |
| Glycine betaine/proline betaine-binding periplasmic protein          | 47               | 109             |
| Putative cryptic phosphonate transport system permease protein PhnE1 | 49               | 113             |
| Inner membrane protein YihN                                          | 13               | 128             |
| Nickel/cobalt homeostasis protein RcnB                               | 27               | 112             |
| 50S ribosomal protein L25                                            | 19               | 94              |
| PTS system glucose-specific EIIA component                           | 8                | 169             |
| PTS system glucose-specific EIIA component                           | 9                | 169             |
| Uncharacterized protein YkfA                                         | 11               | 144             |
| DTW domain-containing protein YfiP                                   | 34               | 100             |
| <b>Unreported initial methionine excision</b>                        |                  |                 |
| Protein GrpE                                                         | 2                | 197             |
| UPF0234 protein YajQ                                                 | 2                | 163             |
| Glutaredoxin 4                                                       | 2                | 115             |
| Iron-sulfur cluster assembly scaffold protein IscU                   | 2                | 128             |
| Protein IscX                                                         | 2                | 66              |
| Putative sulfur carrier protein YeeD                                 | 2                | 75              |
| Putative selenoprotein YdfZ                                          | 2                | 67              |
| UPF0339 protein YegP                                                 | 2                | 110             |

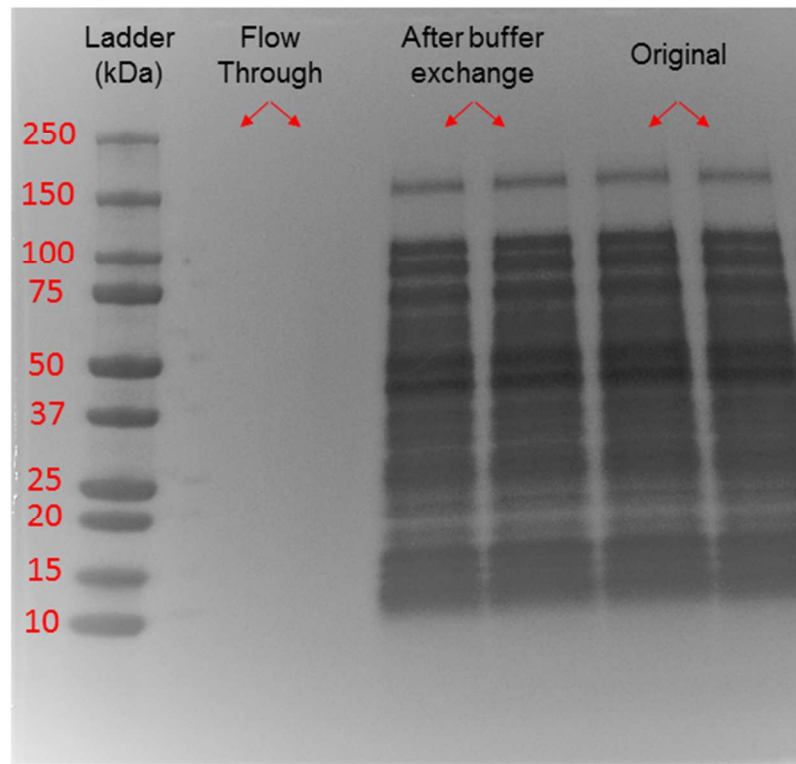

**Figure S1.** Image of the SDS-PAGE result. *E. coli* cell lysate before (Original) and after the buffer exchange with Microcon-30 kDa centrifugal filter units were analyzed by SDS-PAGE. About 16  $\mu$ g of proteins in theory were loaded. The flow through during buffer exchange was also analyzed. We performed the buffer exchange experiment in technical duplicate and the data were shown as the two channels.

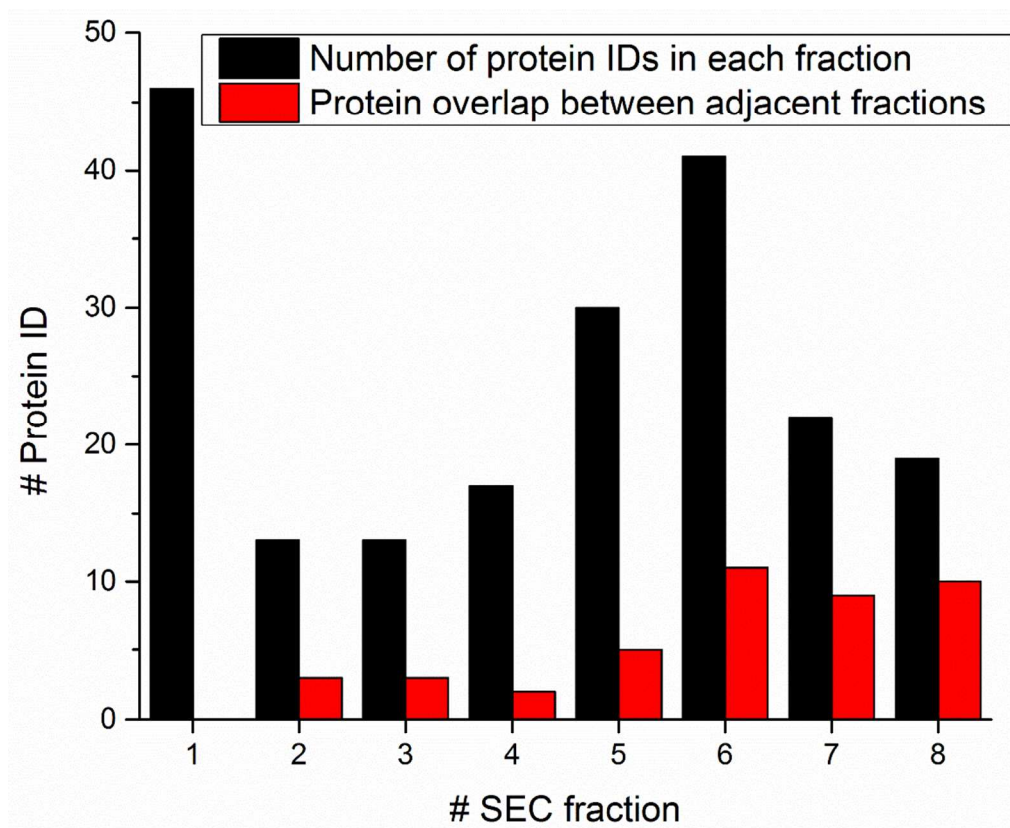

**Figure S2.** The number of protein identifications (IDs) from each SEC fraction and protein overlaps between adjacent SEC fractions.

All proteins / sp|P0ABS1|DKSA\_ECOLI RNA polymerase-binding transcription factor DksA OS=Escherichia coli (strain K12) GN=dksA PE=1 SV=1 /  
Proteomeform #244

### Protein-Spectrum-Match #3700 for Spectrum #800370

|                  |           |                          |            |                             |            |
|------------------|-----------|--------------------------|------------|-----------------------------|------------|
| PrSM ID:         | 3700      | Scan(s):                 | 801726     | Precursor charge:           | 9          |
| Precursor m/z:   | 1954.3036 | Precursor mass:          | 17579.6666 | Proteoform mass:            | 17580.1916 |
| # matched peaks: | 33        | # matched fragment ions: | 30         | # unexpected modifications: | 1          |
| E-value:         | 1.03e-19  | P-value:                 | 1.03e-19   | Q-value (Spectral FDR):     | 0          |

```
1  M Q E G Q N R K T S S L S I L A I A G V E P Y Q E K P G E E 30
                                     63.44725
31  Y M N E A Q L A H F R R I L E A W R N Q L R D E V D R T V T 60
61  H M Q D E A A N F P D P V D R A A Q E E E F S L E L R N R D 90
91  R E R K L I K K I E K T L K K V E D E D F G Y C E S C G V E 120
121 I G I R R L E A R P T A D L C I D C K T L A E I R E K Q M A 150
151  G 151
```

Unexpected modifications: **Unknown [63.44725]**

**Figure S3.** The sequence of the RNA polymerase-binding transcription factor DksA, the observed fragmentation pattern, and the mass shift detected through the database search.

All proteins / sp|P63020|NFUA\_ECOLI Fe/S biogenesis protein NfuA OS=Escherichia coli (strain K12) GN=nfuA PE=1 SV=1 / Proteoform #123

## Protein-Spectrum-Match #4239 for Spectrum #900401

|                  |           |                          |            |                             |            |
|------------------|-----------|--------------------------|------------|-----------------------------|------------|
| PrSM ID:         | 4239      | Scan(s):                 | 902493     | Precursor charge:           | 9          |
| Precursor m/z:   | 2332.3868 | Precursor mass:          | 20982.4156 | Proteoform mass:            | 20982.3206 |
| # matched peaks: | 60        | # matched fragment ions: | 53         | # unexpected modifications: | 1          |
| E-value:         | 3.88e-26  | P-value:                 | 3.88e-26   | Q-value (Spectral FDR):     | 0          |

```

1  M I R I S D A A Q A H F A K L L A N Q E E G T Q I R V F V I 30
31 N P G T P N A E C G V S Y C P P D A V E A T D T A L K F D L 60
61 L T A Y V D E L S A P Y L E D A E I D F V T D Q L G S Q L T 90
91 L K A P N A K M R K V A D D A P L M E R V E Y M L Q S Q I N 120
121 P Q L A G H G G R V S L M E I T E D G Y A I L Q F G G G G C N 150
151 G C S M V D V T L L K E G I E K Q L L N E F P E L K G V R D L 180
181 T E H Q R G E H S Y Y 191

```

**Figure S4.** The sequence of the Fe/S biogenesis protein NfuA, the observed fragmentation pattern, and the mass shift detected through the database search. The mass shift, location of the mass shift, and the cysteine amino acids were highlighted.



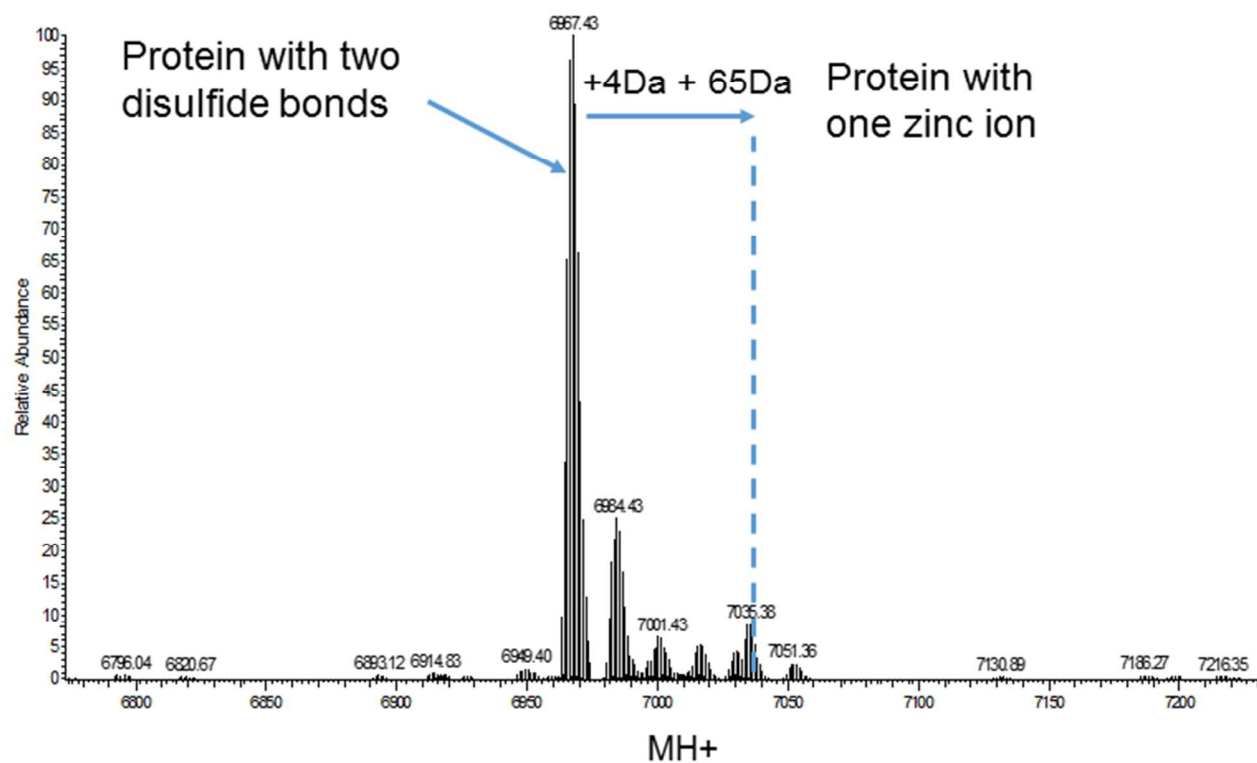

**Figure S5.** The deconvoluted spectrum from the averaged mass spectrum across the peak of the identified 50S ribosomal protein L31 proteoform without the zinc cofactor. The Xtract software from Thermo Fisher Scientific was used for the mass deconvolution with the default settings.

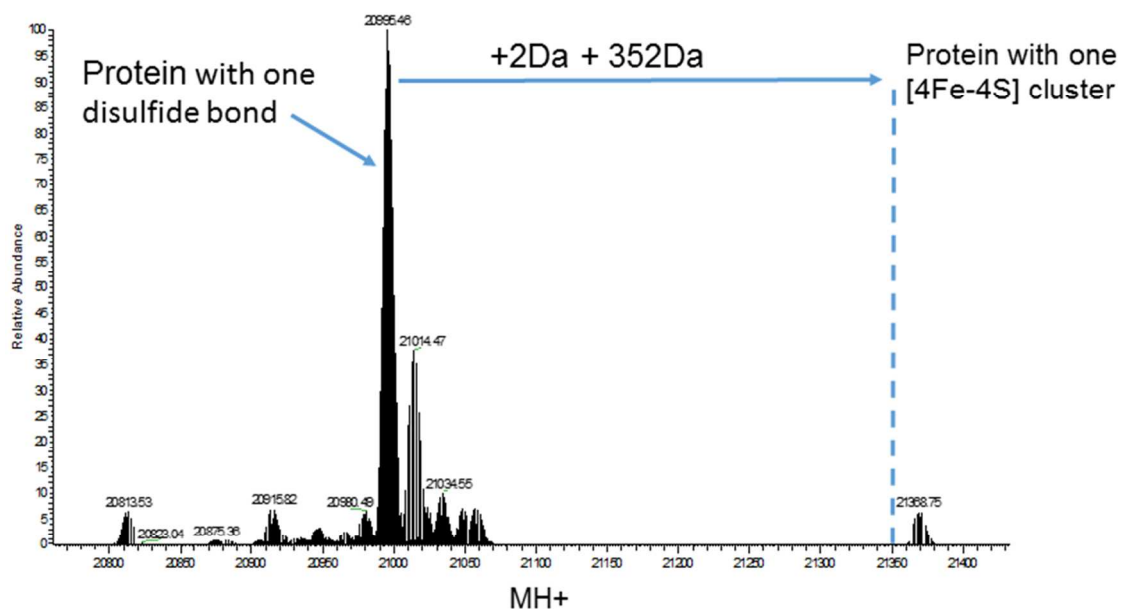

**Figure S6.** The deconvoluted spectrum from the averaged mass spectrum across the peak of the identified Fe/S biogenesis protein NfuA proteoform without the [4Fe-4S] cofactor. The Xtract software from Thermo Fisher Scientific was used for the mass deconvolution with the default settings.

## Protein-Spectrum-Match #993 for Spectrum #300419

|                  |           |                          |            |                             |            |
|------------------|-----------|--------------------------|------------|-----------------------------|------------|
| PrSM ID:         | 993       | Scan(s):                 | 301514     | Precursor charge:           | 7          |
| Precursor m/z:   | 1749.5032 | Precursor mass:          | 12239.4712 | Proteoform mass:            | 12239.5912 |
| # matched peaks: | 57        | # matched fragment ions: | 51         | # unexpected modifications: | 1          |
| E-value:         | 3.44e-38  | P-value:                 | 3.44e-38   | Q-value (Spectral FDR):     | 0          |

41.10868

```

1  M]S I T K D]Q]I]I E ]A]V]A]A]M]S V M D V V E L I S A M E E K 30
31 F G V S A A A A V]A ]V]A]A]G]P V E A A E E K]T E]F D V]I]L]K 60
61 ]A]A]G A N K]V]A V I K A V R G A T G L]G ]L K E A K]D]L]V]E]S 90
91 ]A]P A A]L K]E]G V]S ]K]D]D]A E]A]L]K]K A ]L E]E]A]G A E]V E V 120
121 K 121

```

Variable PTMs: **Acetyl [S2 ]**

Unexpected modifications: **Unknown [41.10868]**

**Figure S7.** The sequence of the 50S ribosomal protein L7/L12, the observed fragmentation pattern, and the modifications through the database search. The initial methionine excision, N-terminal acetylation, and one +41 Da modification were labelled.

## Protein-Spectrum-Match #1468 for Spectrum #300964

|                  |           |                          |           |                             |           |
|------------------|-----------|--------------------------|-----------|-----------------------------|-----------|
| PrSM ID:         | 1468      | Scan(s):                 | 302428    | Precursor charge:           | 6         |
| Precursor m/z:   | 1448.6293 | Precursor mass:          | 8685.7319 | Proteoform mass:            | 8685.9919 |
| # matched peaks: | 28        | # matched fragment ions: | 26        | # unexpected modifications: | 1         |
| E-value:         | 1.39e-16  | P-value:                 | 1.39e-16  | Q-value (Spectral FDR):     | 0         |

1 M F T I N A E V R K E Q G K G A S R L R A A N K F P A I I 30  
 2.30888  
 31 Y G G K E A P L A I E L D H D K V M N M Q A K A E F Y S E V 60  
 61 L T I V V D G K E I K V K A Q D V Q R H P Y K P K L Q H I D 90  
 91 F V R A 94

Unexpected modifications: Unknown [2.30888]

**Figure S8.** The sequence of the 50S ribosomal protein L25, the observed fragmentation pattern, and the modifications through the database search. The first 18 amino acids are cleaved as a signal peptide, which has not been reported in the literature. The signal peptide cleavage and one +2.3 Da modification were labelled.

## References

- (1) Zhu, G.; Sun, L.; Dovichi, N.J. *Talanta* **2016**, *146*, 839-843.
- (2) Chen, D.; Shen, X.; Sun, L. *Analyst* **2017**, *142*, 2118-2127.
- (3) Sun, L.; Zhu, G.; Zhao, Y.; Yan, X.; Mou, S.; Dovichi, N. J. *Angew. Chem. Int. Ed.* **2013**, *52*, 13661-13664.
- (4) Skinner, O. S.; Haverland, N. A.; Fornelli, L.; Melani, R. D.; Do Vale, L. H.; Seckler, H. S.; Doubleday, P. F.; Schachner, L. F.; Srzentić, K.; Kelleher, N. L.; Compton, P. D. *Nat. Chem. Biol.* **2018**, *14*, 36-41.
- (5) Wojcik, R.; Dada, O. O.; Sadilek, M.; Dovichi, N. J. *Rapid Commun. Mass Spectrom.* **2010**, *24*, 2554-2560.
- (6) Sun, L.; Zhu, G.; Zhang, Z.; Mou, S.; Dovichi, N. J. *J. Proteome Res.* **2015**, *14*, 2312-2321.
- (7) Kessner, D.; Chambers, M.; Burke, R.; Agus, D.; Mallick, P. *Bioinformatics* **2008**, *24*, 2534– 2536.
- (8) Liu, X.; Inbar, Y.; Dorrestein, P. C.; Wynne, C.; Edwards, N.; Souda, P.; Whitelegge, J. P.; Bafna, V.; Pevzner, P. A. *Mol. Cell. Proteomics* **2010**, *9*, 2772– 2782.
- (9) Kou, Q.; Xun, L.; Liu, X. *Bioinformatics* **2016**, *32*, 3495-3497.
- (10) Elias, J. E.; Gygi, S. P. *Nat. Methods* **2007**, *4*, 207–214.
- (11) McCool, E. N.; Lubeckyj, R. A.; Shen, X.; Chen, D.; Kou, Q.; Liu, X.; Sun, L. *Anal Chem.* **2018**, *90*, 5529-5533.
